# Supplementary material for: Calibrated interdental brushing for the prevention of periodontal pathogens infection in young adults - a randomized controlled clinical trial
Source: PubMed Central journal article supplement (PMC6805917; doi:10.1038/s41598-019-51938-8), 2019-10-22

## Calibrated interdental brushing for the prevention of periodontal pathogens infection in young adults - a randomized controlled clinical trial

Denis Bourgeois, Manuel Bravo, Juan-Carlos Llodra, Camille Inquimbert,  
Stéphane Viennot, Claude Dussart, Florence Carrouel

### Supplementary Table 1. Species-specific and ubiquitous real-time PCR primers for 19 periodontal bacteria, the annealing temperature, and the limit of quantification.

LOQ: Limit of quantification; TB: Total Bacterial count.

| Target        | Primer pairs (5'-3')                                    | References                | Annealing temp (°C) | LOQ (E+02) |
|---------------|---------------------------------------------------------|---------------------------|---------------------|------------|
| TB            | CCATGAAGTCGGAATCGCTAGT<br>GCTTGACGGGCGTG                | Kozarov et al.,<br>2006   | 66                  | 200        |
| <i>Aa</i>     | AAACCCATCTCTGAGTTCTTCTTC<br>ATGCCAACTTGACGTTAAAT        | Kobayashi et al.,<br>2008 | 60                  | 10         |
| <i>Ao</i>     | CTTTGGGATAACGCCGGGAAAC<br>CTACCCGTCAAAGCCTTGGT          | Yang et al.,<br>2007      | 66                  | 5          |
| <i>Av</i>     | ATGTGGGTCTGACCTGCTGC<br>CAAAGTCGATCACGCTCCG             | Suzuki et al.,<br>2005    | 60                  | 5          |
| <i>Cc</i>     | GGCTCAAAAGAGATCGCTCA<br>CCCTCAACAACGCTTAGCTC            | Chaban et al.,<br>2009    | 66                  | 5          |
| <i>Cg</i>     | AGAGTTTGATCCTGGCTCAG<br>GGACGCATGCCATCTTTCACCACCGC      | Kobayashi et al.,<br>2008 | 66                  | 5          |
| <i>Co</i>     | AGAGTTTGATCCTGGCTCAG<br>GATGCCGCTCCTATATACTATGGGG       | Kobayashi et al.,<br>2008 | 66                  | 5          |
| <i>Cr</i>     | TTTCGGAGCGTAAACTCCTTTTC<br>TTTCTGCAAGCAGACACTCTT        | Kobayashi et al.,<br>2008 | 60                  | 20         |
| <i>Cs</i>     | AGAGTTTGATCCTGGCTCAG<br>GATGCCGCTCCTATATAACCATTAGG      | Kobayashi et al.,<br>2008 | 66                  | 5          |
| <i>Ec</i>     | GGGAAGAAAAGGGAAGTGCT<br>TCTCAGGTACCGTCAGCAAAA           | Kozarov et al.,<br>2006   | 60                  | 50         |
| <i>Fn</i>     | AGAGTTTGATCCTGGCTCAG<br>GTCATCGTGCACACAGAATTGCTG        | Fouad et al.,<br>2002     | 60                  | 40         |
| <i>Pi</i>     | CGTGGACCAAAGATTCATCGGTGG<br>ACCGCTTACTCCCAACAAA         | Fouad et al.,<br>2002     | 60                  | 60         |
| <i>Pm</i>     | AGAGTTTGATCCTGGCTCAG<br>ATATCATGCGATTCTGTGGTCTC         | Fouad et al.,<br>2002     | 60                  | 60         |
| <i>Pn</i>     | ATGAAACAAAAGTTTTCCGGTAAG<br>CCCACGTCTCTGTGGGCTGCGA      | Fouad et al.,<br>2002     | 66                  | 5          |
| <i>Smitis</i> | GAGTCCTGCATCAGCCAAGAG<br>GGATCCACCTTTTCTGCTTGAC         | Suzuki et al.,<br>2005    | 66                  | 5          |
| <i>Spp</i>    | AGAGTTTGATCCTGGCTCAG<br>GTACCGTCACAGTATGAACTTTCC        | Fouad et al.,<br>2002     | 66                  | 10         |
| <i>Td</i>     | TAATACCGAATGTGCTCATTACAT<br>TCAAAGAAGCATTCCCTCTTCTTCTTA | Sakamoto et al.,<br>2001  | 60                  | 10         |
| <i>Tf</i>     | GCGTATGTAACCTGCCCGCA<br>TGCTTCAGTGTGAGTTATACCT          | Sakamoto et al.,<br>2001  | 60                  | 80         |
| <i>Vp</i>     | GAAGCATTGGAAGCGAAAGTTTCG<br>GTGTAACAAGG-GAGTACGGACC     | Igarashi et al.,<br>2009  | 60                  | 5          |

**Supplementary Figure 1.**

(A) Colorimetric probe, (B) Interdental brushes, (C) Interdental space examination, (D) Interdental brushing with a calibrated interdental brush.

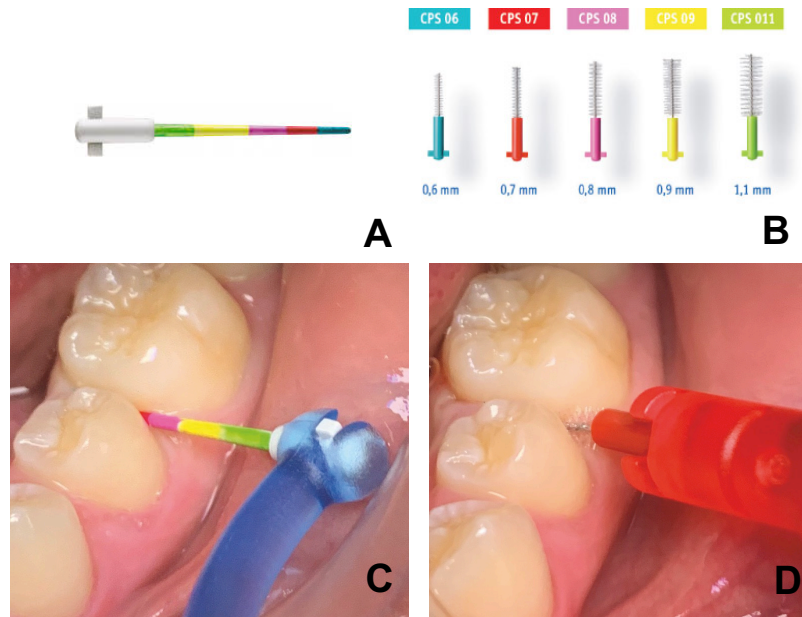

Supplement: 41598_2019_51938_MOESM1_ESM.pdf [file 41598_2019_51938_MOESM1_ESM.pdf]
